# Supplementary material for: Novel botanical drug DA-9803 prevents deficits in Alzheimer’s mouse models
Source: Springer Nature journal article supplement (doi:10.1186/s13195-018-0338-2), 2018-01-29
Supplement: MOESM1 [file 15422378]

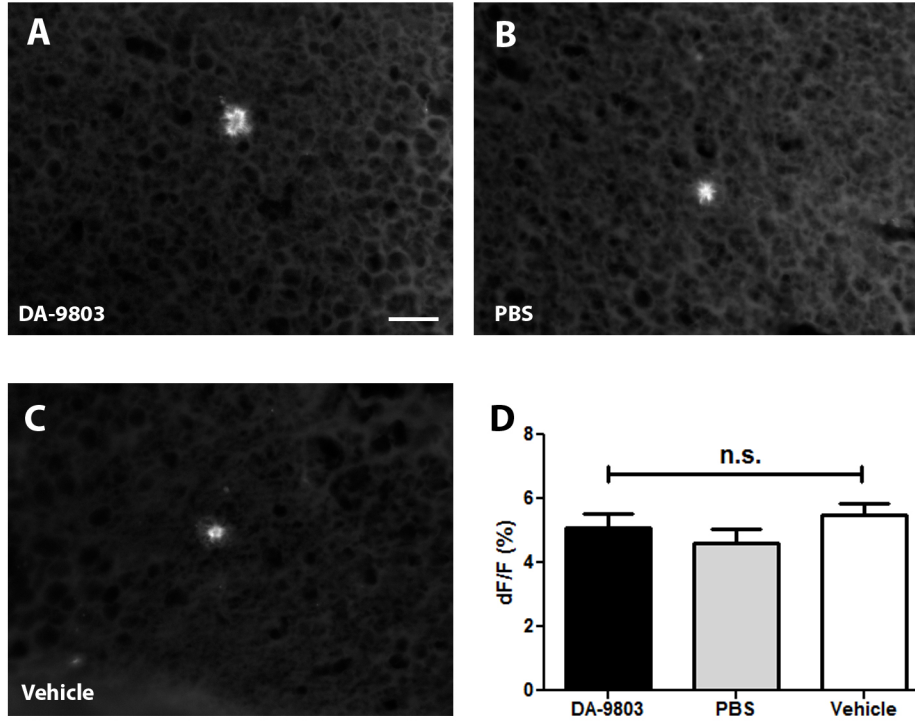

Supplemental Figure 1
